# Supplementary material
Source: publisher figshare collection journal article supplement (https://sage.figshare.com/ndownloader/files/12974009)
Supplement: Supplementary file 1 [file 12974009]

# DATA AND REPLICATION FILES

## Youth Bulges and Civil Conflict: Causal Evidence from Sub-Saharan Africa

### Replication Code

- `YouthBulgeCountryLevel.do` contains the Stata code with which the country-level regression results can be replicated (Tables 1–4 and S1.1–S1.12 as well as Figures S1.1–S1.2).
- `YouthBulgeRegionalLevel.do` contains the Stata code with which the regional level regression results can be replicated (Table 5 and S2.1).

### Data sets

Two datasets are used in the empirical analysis:

- **`YouthBulgeCountryLevel.dta`**: Country level dataset.
- **`YouthBulgeRegionalLevel.dta`**: Regional level dataset.
